# Supplementary material for: A new strategy to synthesize anisotropic SmCo5 nanomagnets
Source: Royal Society of Chemistry journal article supplement (doi:10.1039/c8nr01690a), 2018-01-01
Supplement: c8nr01690a1.pdf [file c8nr01690a1.pdf]

## A New Strategy to Synthesize Anisotropic $\text{SmCo}_5$ Nanomagnets

Bo Shen,<sup>a</sup> Chao Yu,<sup>a</sup> Dong Su,<sup>b</sup> Zhouyang Yin,<sup>a</sup> Junrui Li,<sup>a</sup> Zheng Xi,<sup>a</sup> and Shouheng Sun<sup>\*a</sup>

a. Department of Chemistry, Brown University, Providence, Rhode Island 02912, United States

b. Center for Functional Nanomaterials, Brookhaven National Laboratory, Upton, New York 11973, United States

Additional supporting data:

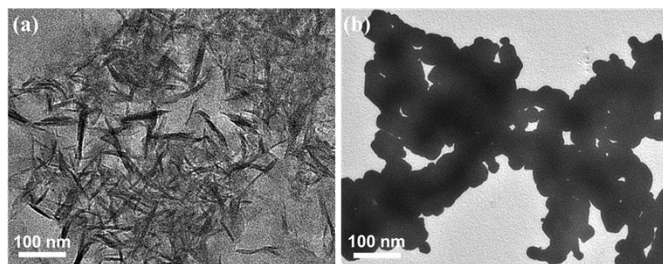

**Fig. S1** (a) TEM image of  $\text{Sm}(\text{OH})_3$  NRs embedded in  $\text{Co}(\text{OH})_2$  matrix. (b) TEM image of  $\text{SmCo}_5$  obtained after Ca reduction of (a), showing no specific shape feature.

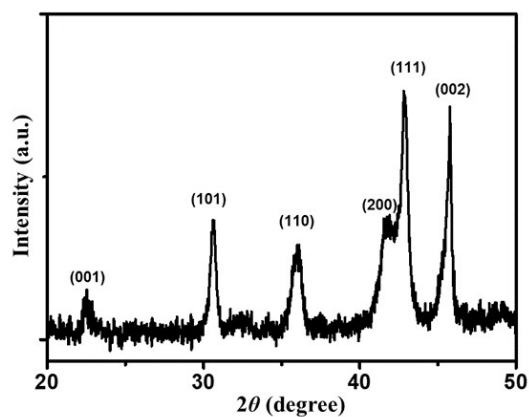

**Fig. S2** XRD pattern of  $\text{SmCo}_5$  nanoplates obtained from their ethanol dispersion after ethanol evaporation under a 20 kOe field.
